# Supplementary material
Source: PubMed Central journal article supplement (PMC7237827)
Supplement: mmc1.pdf [file mmc1.pdf]

```
atg gcc caa agg ctt aca ggt gaa cag aca ctg gac cac tat gag gat agc acc cat gca
M  A  Q  R  L  T  G  E  Q  T  L  D  H  Y  E  D  S  T  H  A
agc atc ttc acc tat acc aac agc aac agc acc aaa ggt ccc ttt gaa ggc ccc aat tat
S  I  F  T  Y  T  N  S  N  S  T  K  G  P  F  E  G  P  N  Y
cac att gct ccc cag gtg ggt gta cca cct cac cag cac ctg gat gat tct tgt ggt cgt
H  I  A  P  Q  V  G  V  P  P  H  Q  H  L  D  D  S  C  G  R
tgc atc tgt ctt cac taa tgg act tgt gct ggc agc cac cat gag att caa gaa gct gcg
C  I  C  L  H  -  W  T  C  A  G  S  H  H  E  I  Q  E  A  A
cca tcc act gaa ctg gat tct ggt gaa ctt ggc agt tgc tga cct agc aga gac cat tat
P  S  T  E  L  D  S  G  E  L  G  S  C  -  P  S  R  D  H  Y
tgc cag cac tat cag tgt tgt gaa cca aat cta tgg cta ctt cgt tct ggg aca ccc tct
C  Q  H  Y  Q  C  C  E  P  N  L  W  L  L  R  S  G  T  P  S
gtg tgt cat tga agg cta cat tgt ctc att gtg
V  C  H  -  R  L  H  C  L  I  V
```

Fig. S1
