# Supplementary material
Source: PubMed Central journal article supplement (PMC7237827)

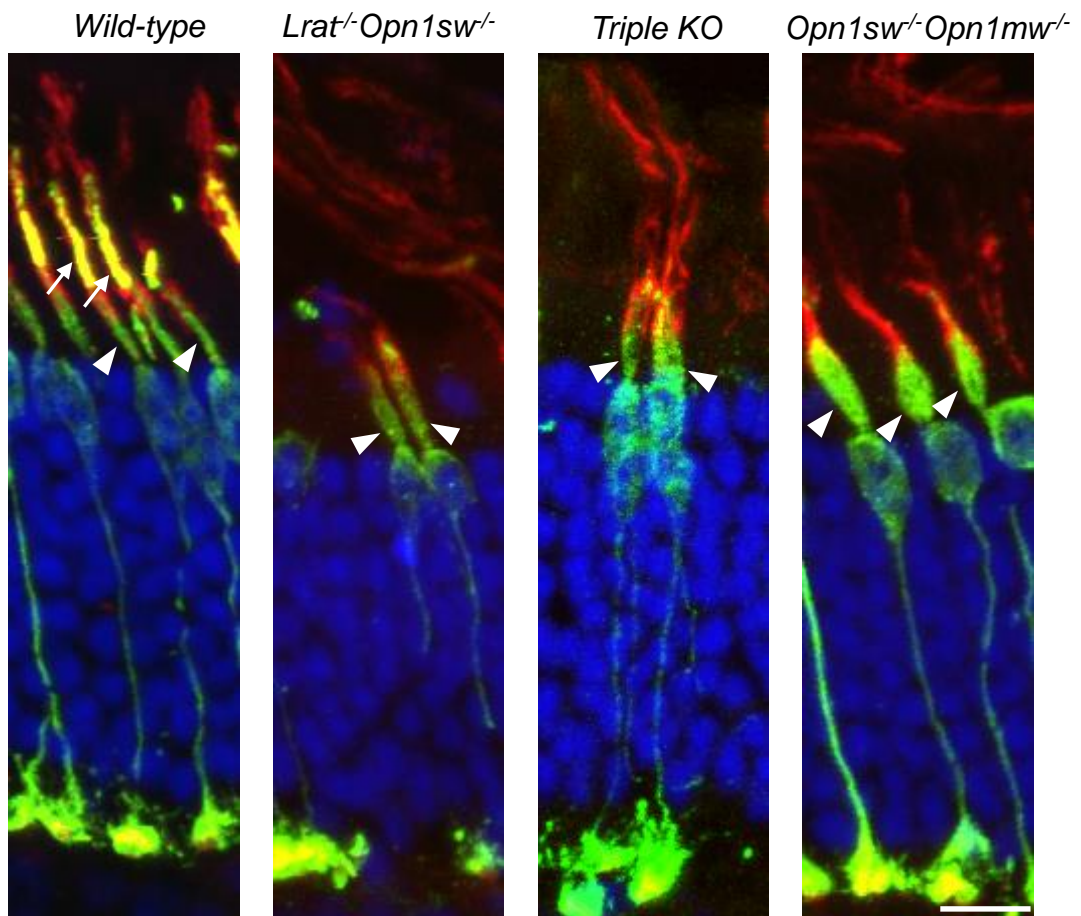

Fig. S2

Supplement: mmc2.pdf [file mmc2.pdf]

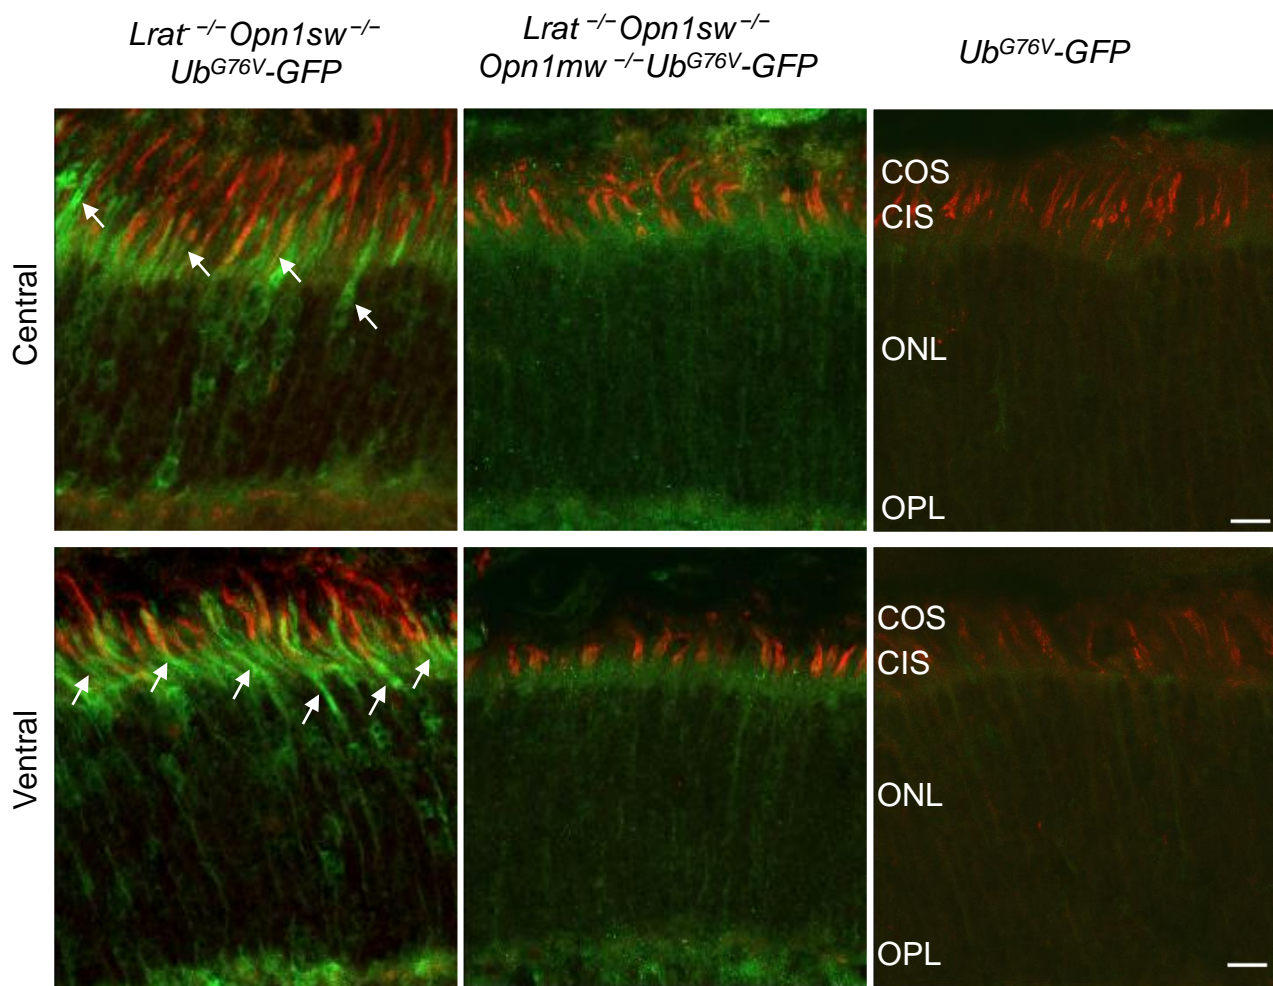

Fig. S3

Supplement: mmc3.pdf [file mmc3.pdf]
